# Supplementary material for: Characterization of Gut Microbiome in Liver Transplant Recipients With Nonalcoholic Steatohepatitis
Source: PubMed Central journal article supplement — Transplant Direct. 2020 Nov 10;6(12):e625. doi: 10.1097/TXD.0000000000001033 (PMC7665248; doi:10.1097/txd.0000000000001033), 2020-11-10
Supplement: txd-6-e625-s001.pdf [file txd-6-e625-s001.pdf]

# SDC

## Figure S1-S11: Correlation plots

### Figure S1

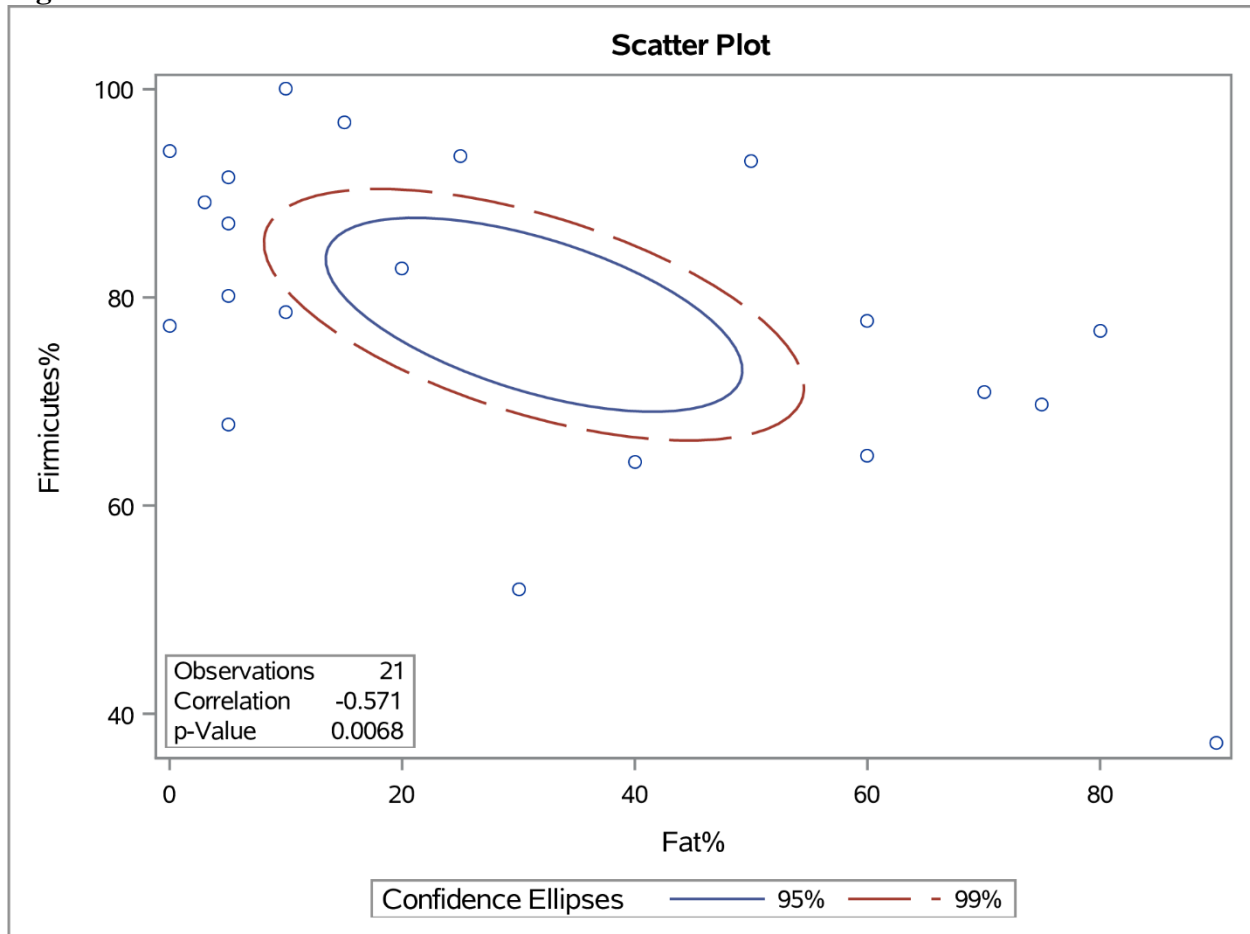

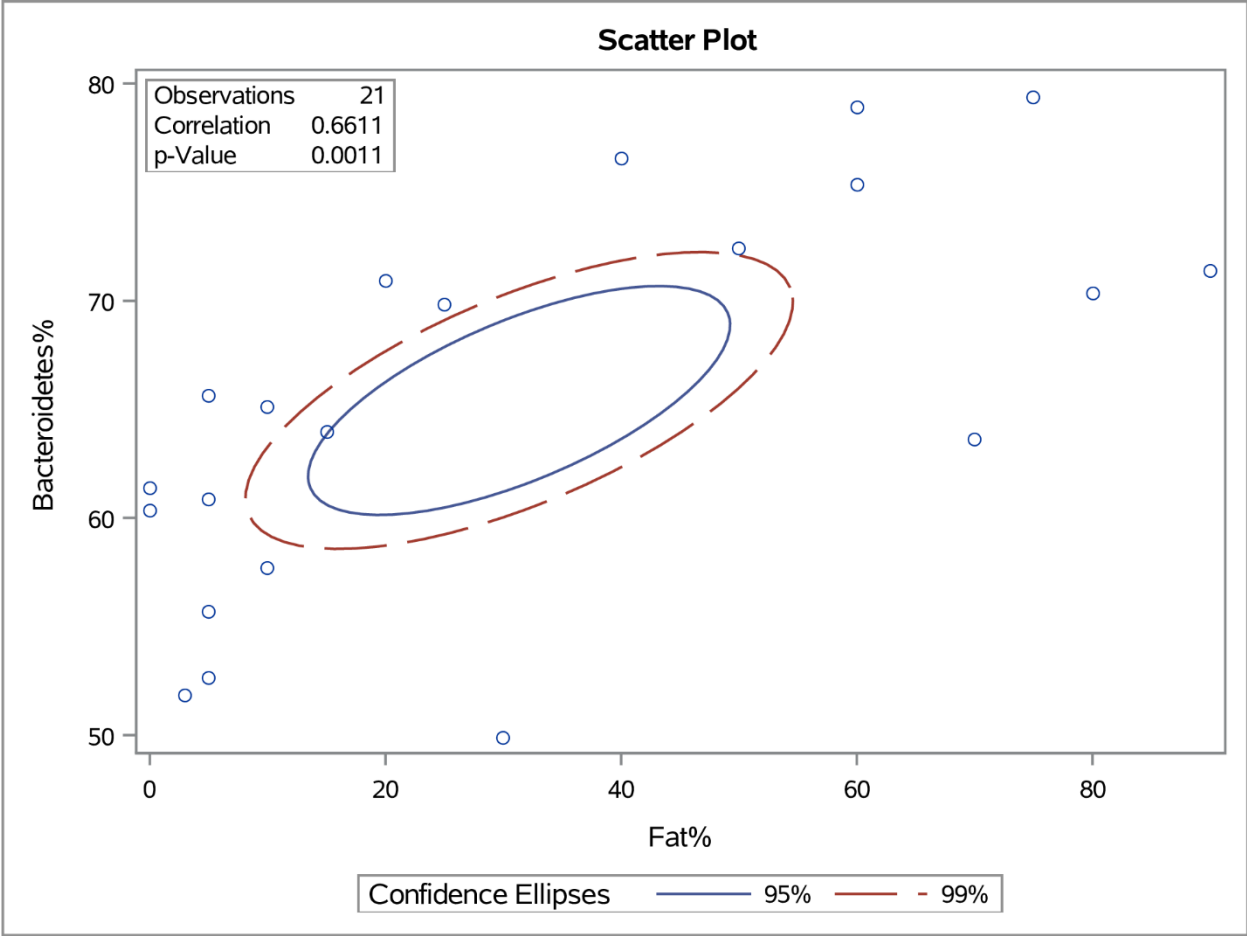

**Figure S2**

Figure S3

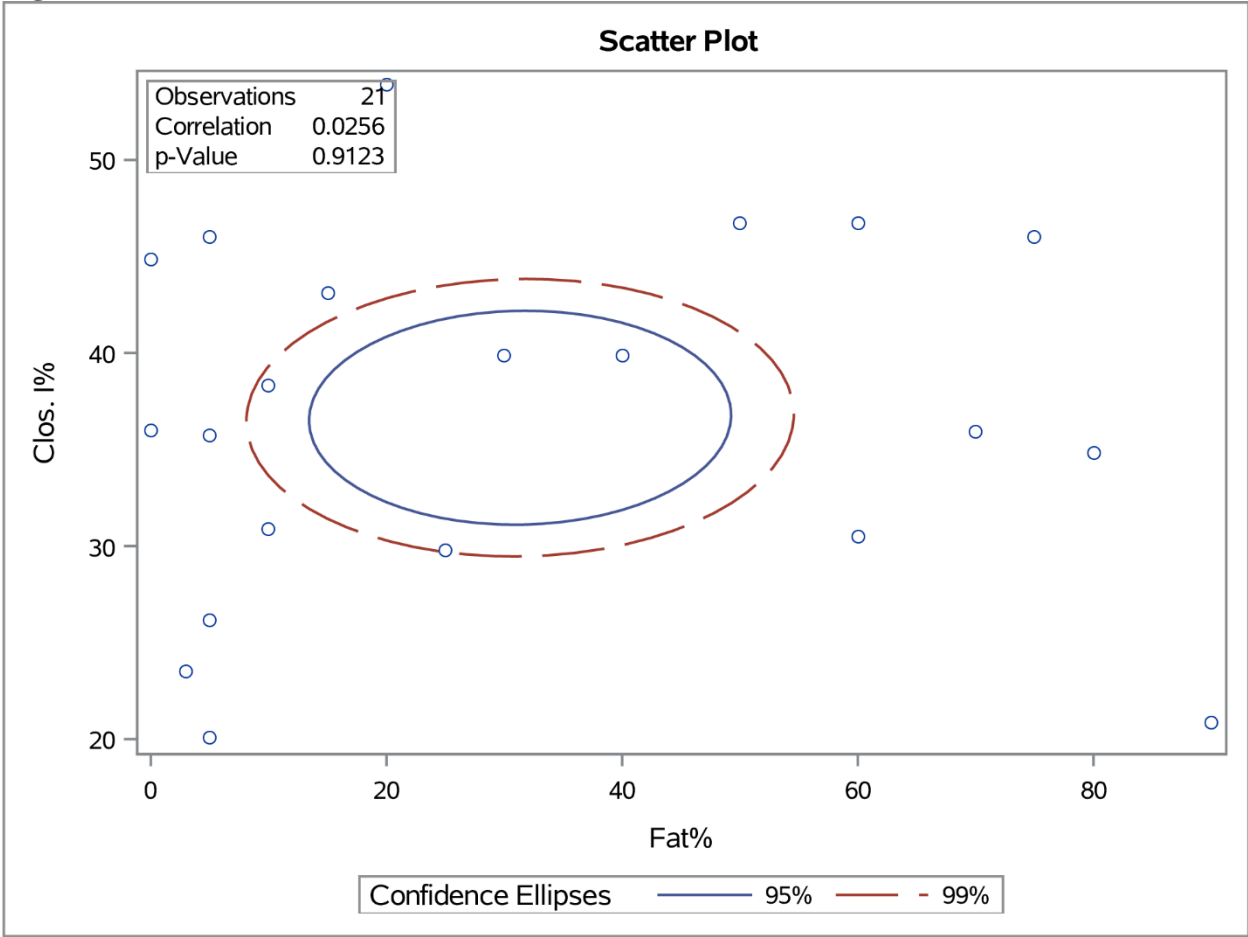

Figure S4

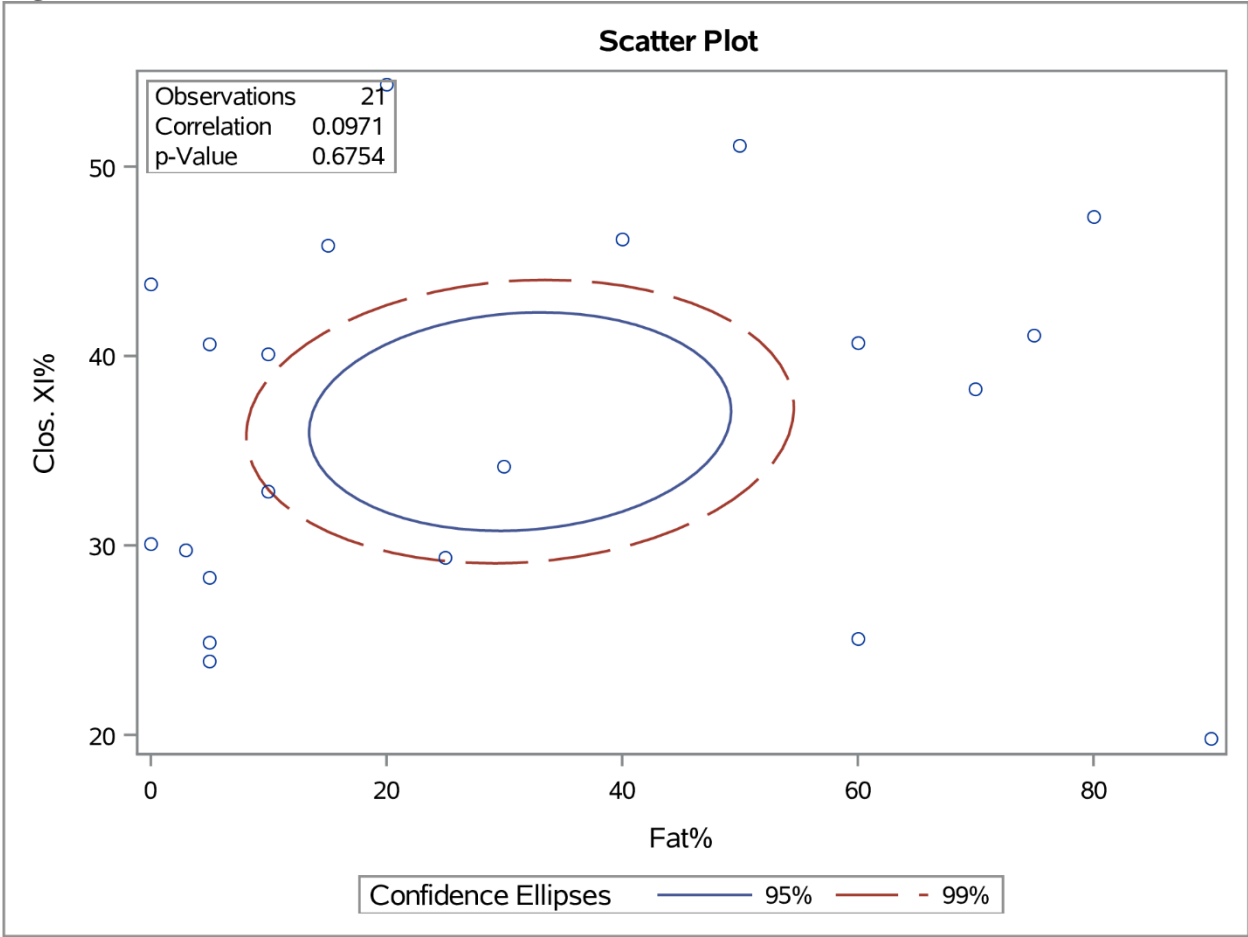

Figure S5

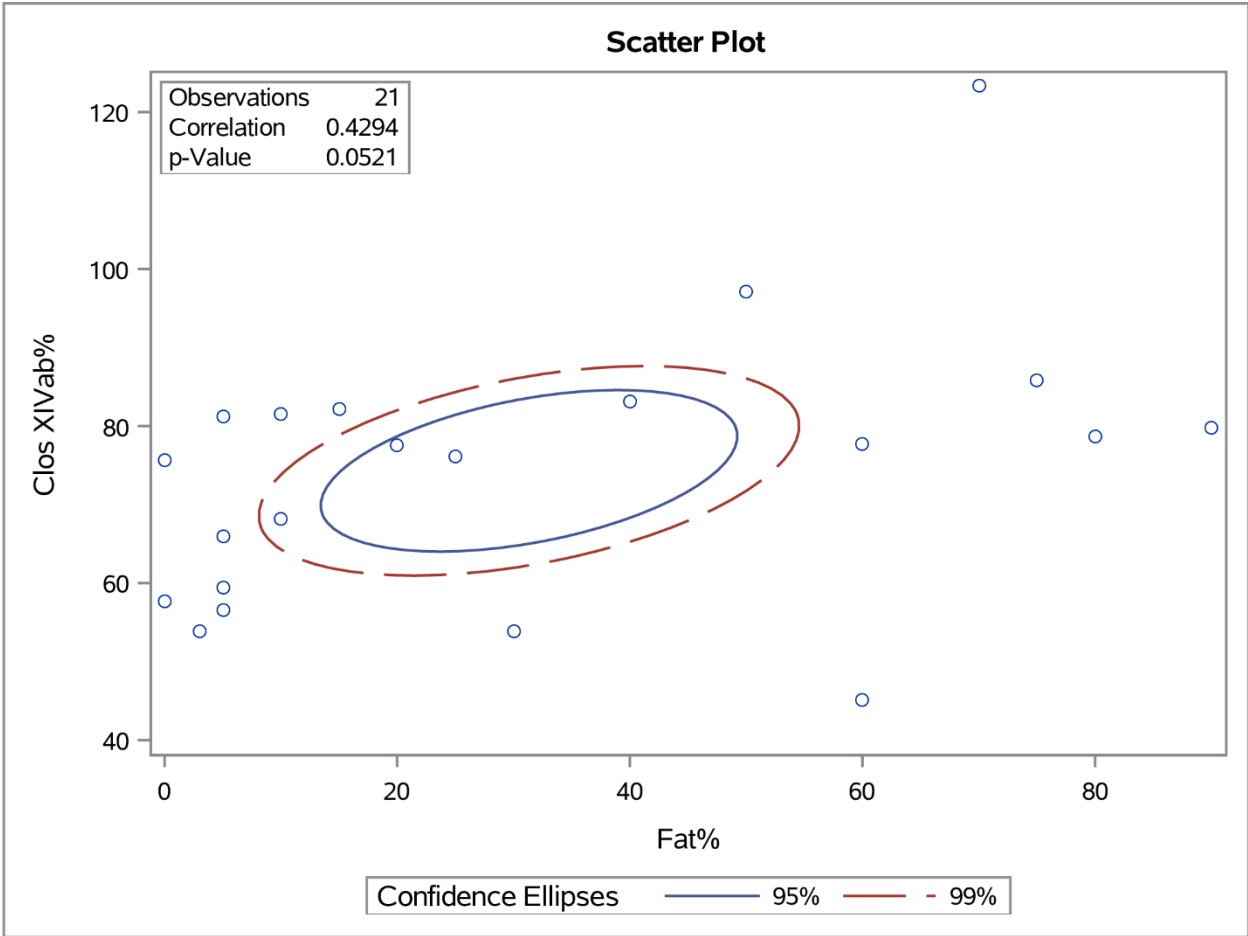

Figure S6

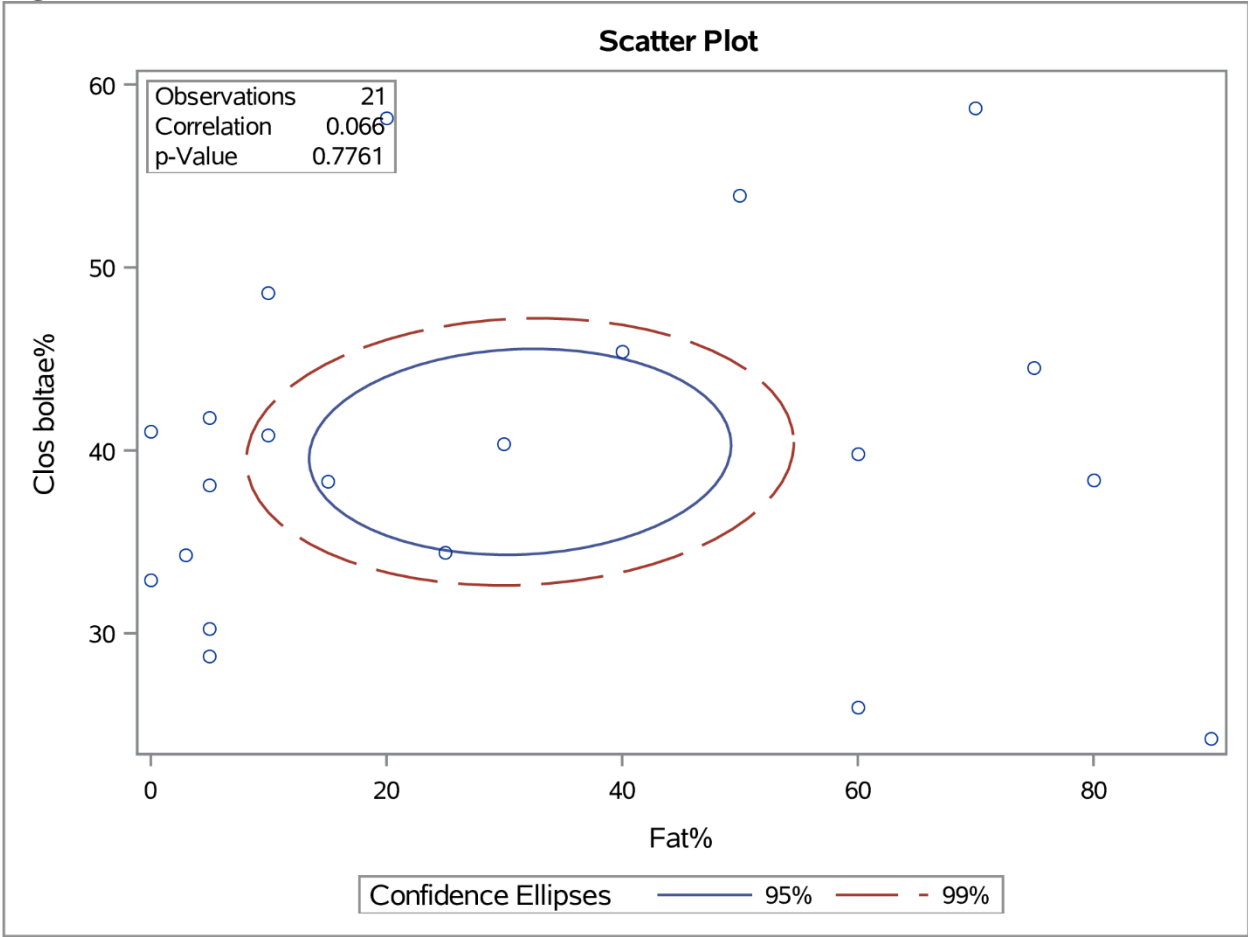

Figure S7

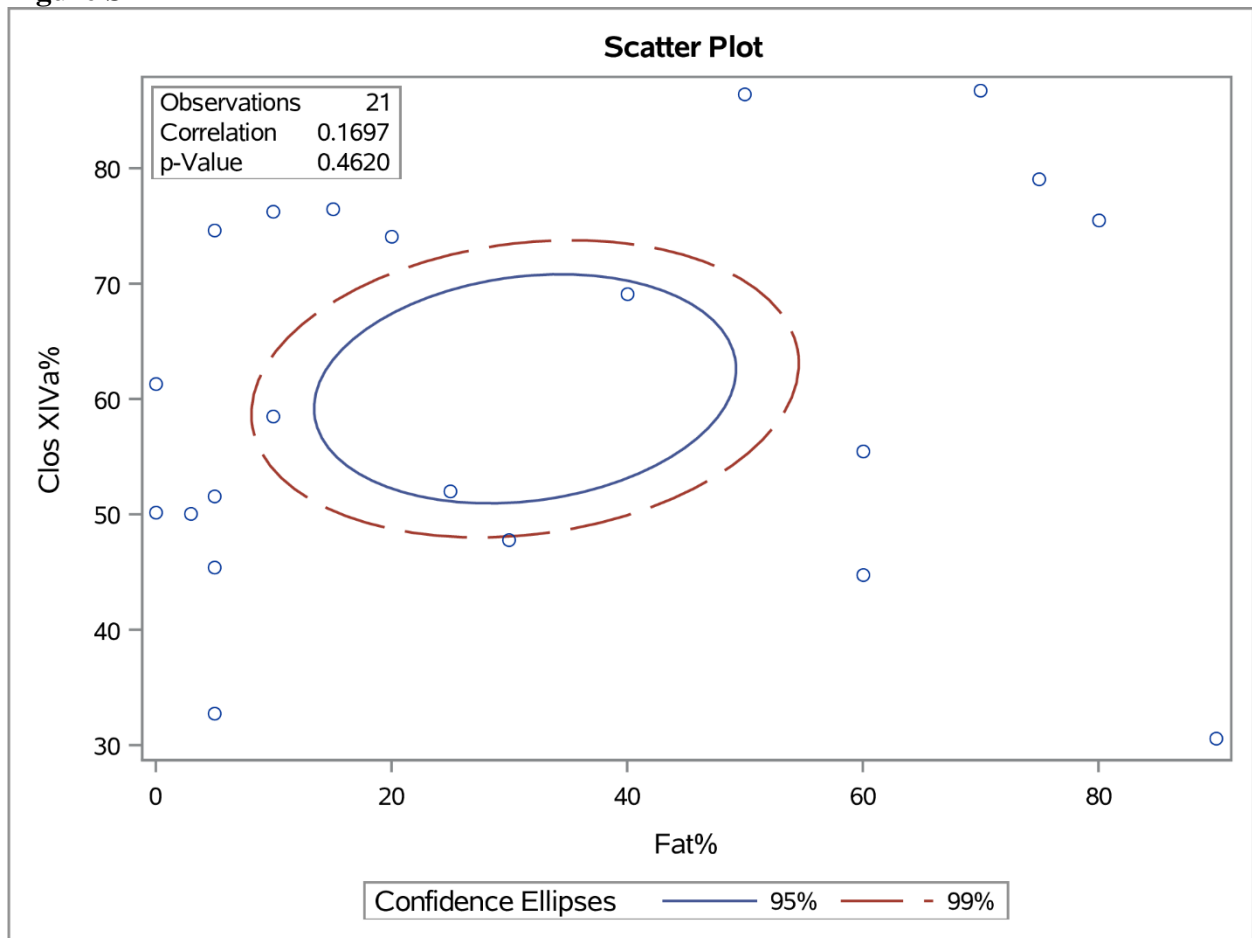

Figure S8

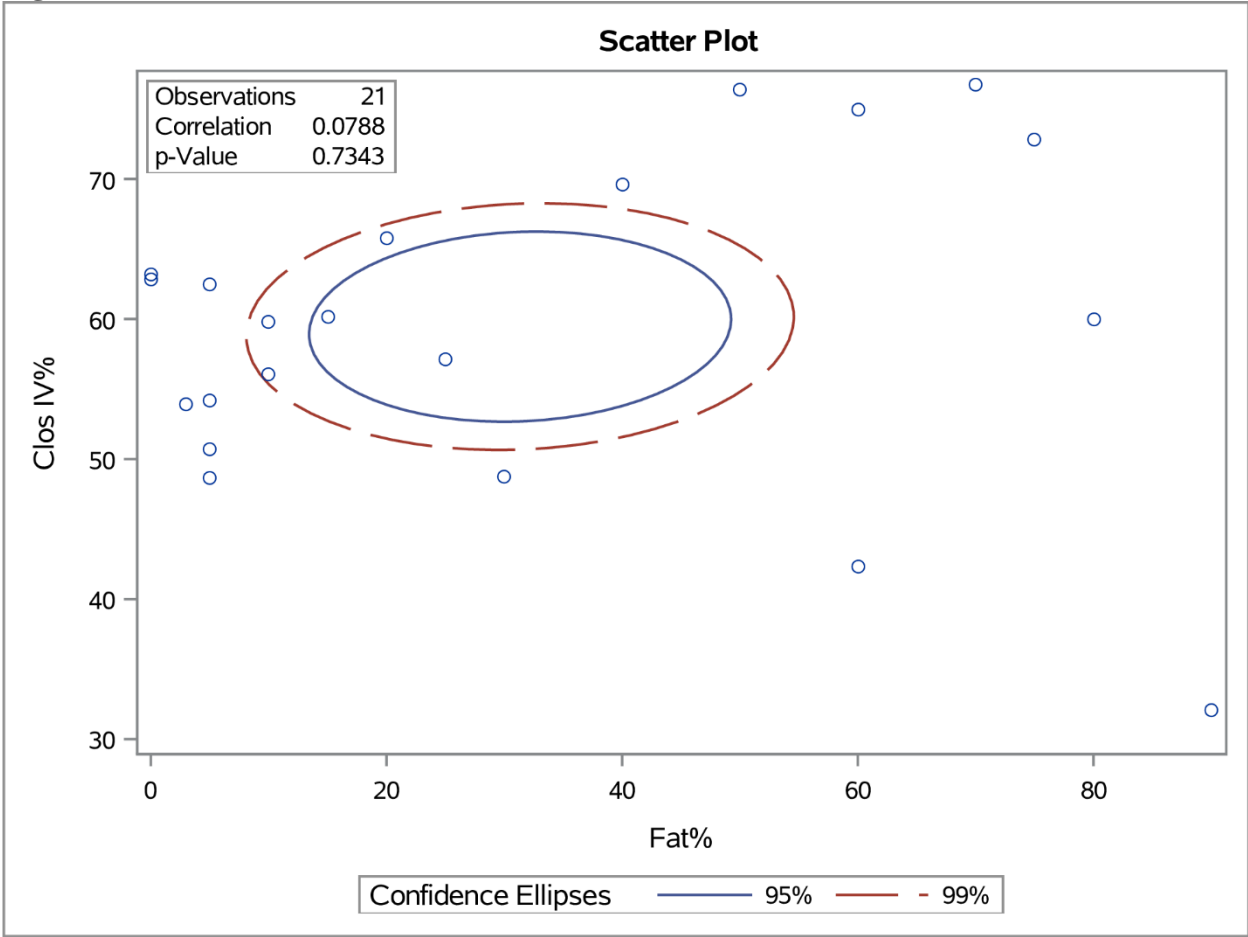



Figure S9

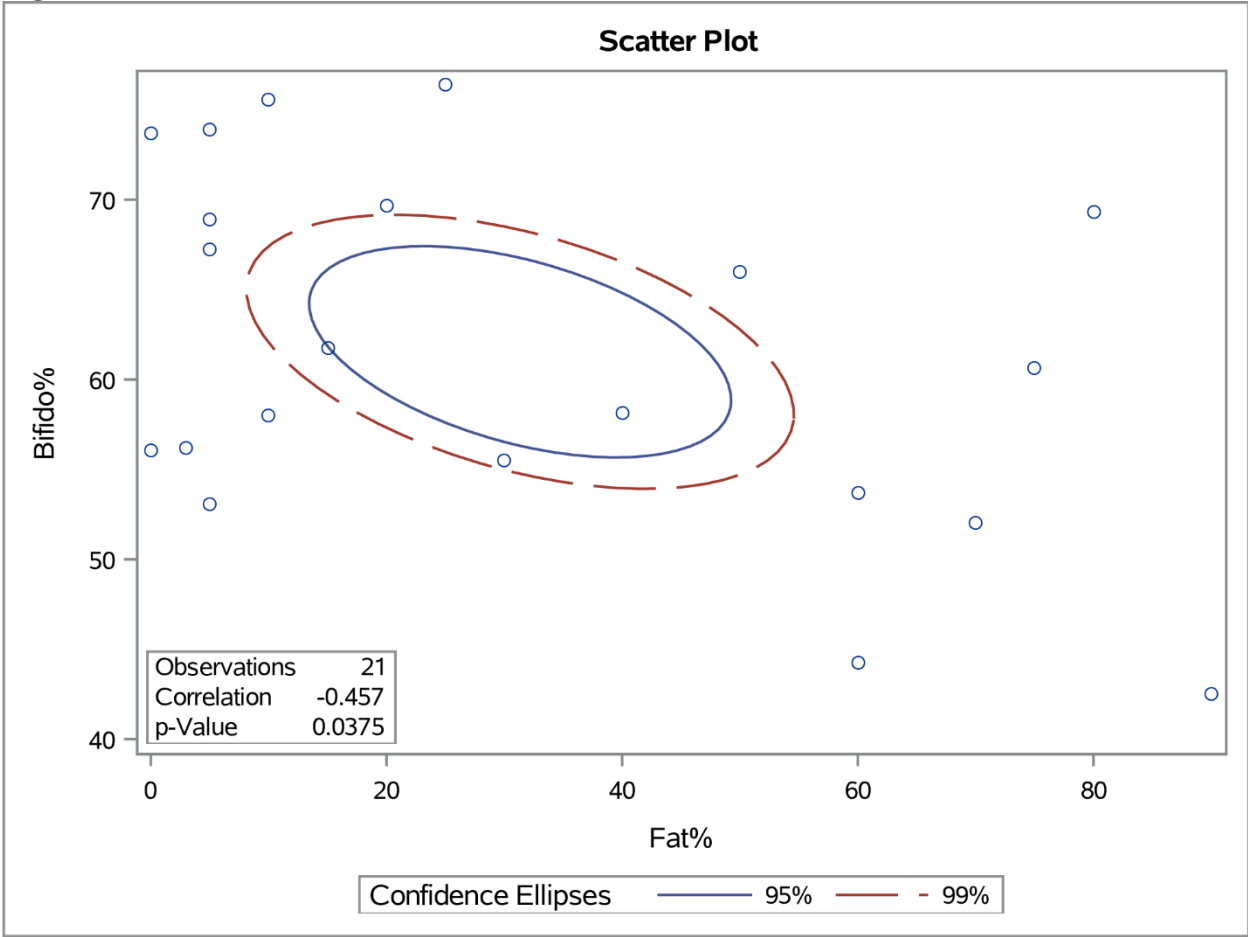

Figure S10

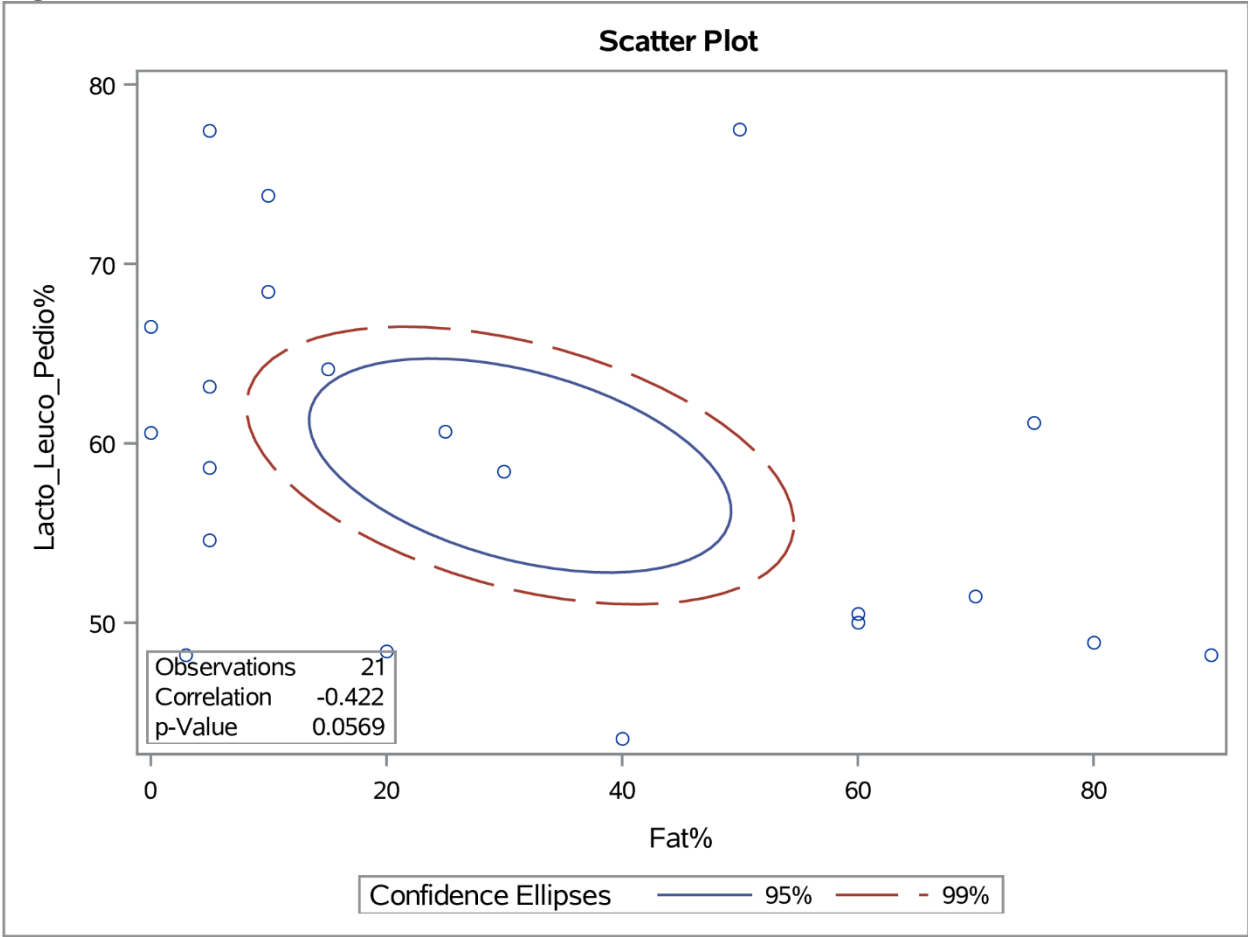

**Figure S11**

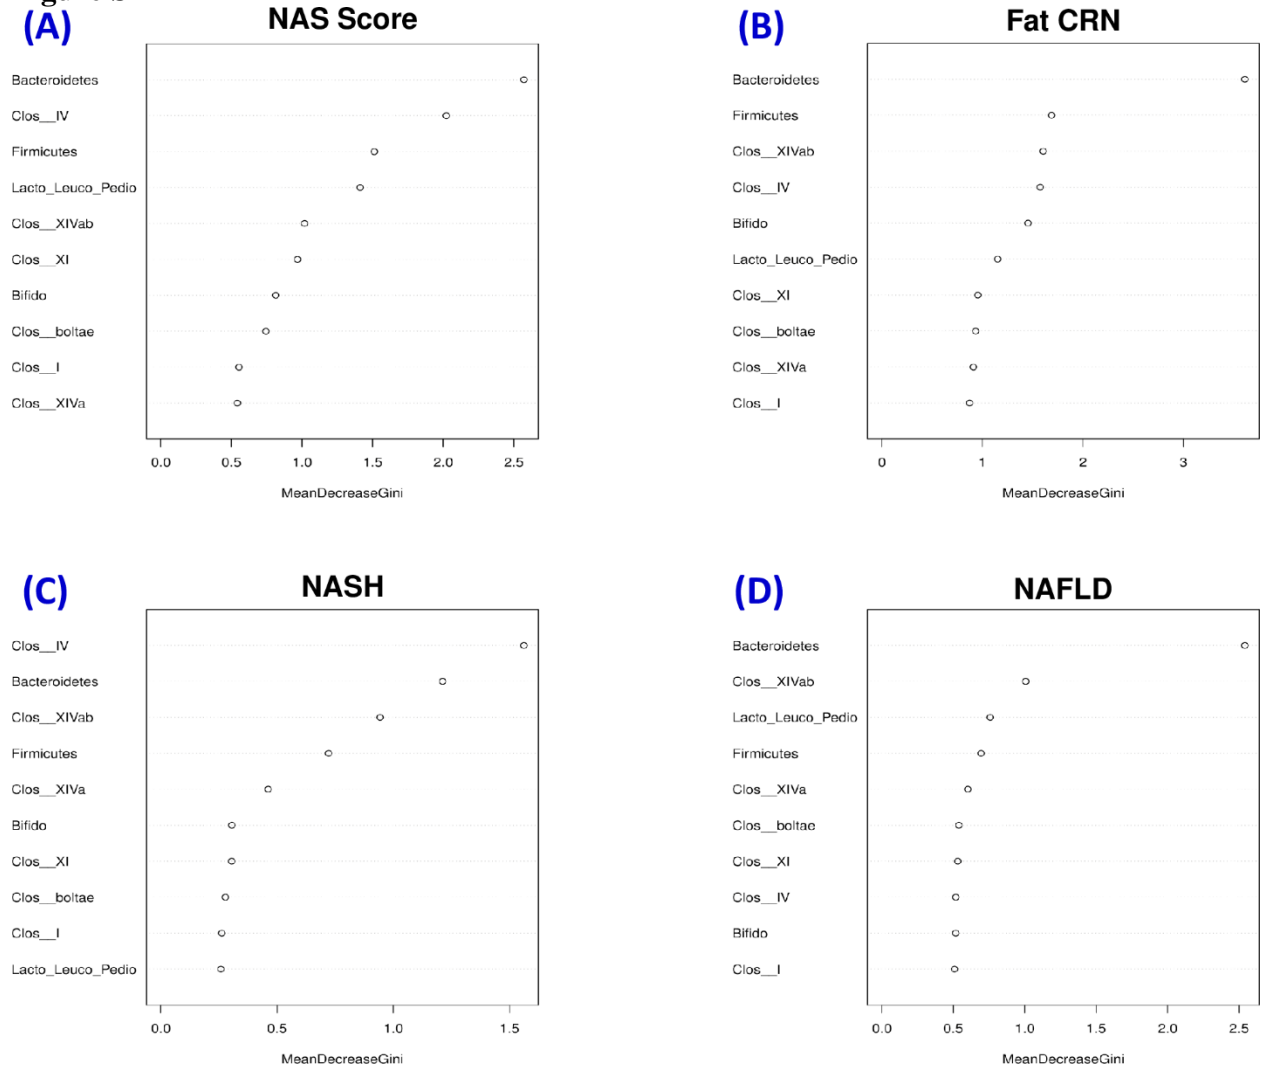

**Figure S11. Importance of bacterial taxa in predicting NAS scores, steatosis, NASH, and NAFLD status computed by Random Forest model. Bacterial taxa (along the Y-axis) are arranged according to their importance in predicting NAS score (panel A), Steatosis (panel B), NASH status (panel C), and NAFLD status (panel D).**

**Table S1.** Demographic and clinical data at the time of liver biopsy and stool collection.

| <b>Variables</b>           | <b>At Liver Biopsy</b> | <b>At the time of stool collection</b> | <b>P-value</b> |
|----------------------------|------------------------|----------------------------------------|----------------|
|                            | <b>N=21</b>            | <b>N=21</b>                            |                |
| Age                        | 61±7                   | 62±7                                   | 0.48           |
| BMI (kg/m <sup>2</sup> )   | 33±7                   | 33±8                                   | 0.68           |
| AST (IU/mL)                | 37±24                  | 38±21                                  | 0.86           |
| ALT (IU/mL)                | 64±50                  | 51±32                                  | 0.38           |
| T. Bili (mg/dL)            | 0.5±0.2                | 0.7±0.4                                | 0.09           |
| ALP (IU/mL)                | 120±45                 | 95±42                                  | 0.11           |
| Albumin (g/dL)             | 3.8±0.5                | 4±0.4                                  | 0.02           |
| Cr (mg/dL)                 | 1.3±0.4                | 1.2±0.4                                | 0.19           |
| Hgb (g/dL)                 | 13.2±2                 | 13.4±2.1                               | 0.64           |
| WBC (x10 <sup>3</sup> /uL) | 5.6±2.4                | 5.8±2.6                                | 0.97           |
| INR                        | 1.1±0.08               | 1.04±0.1                               | 0.32           |
| Triglycerides (mg/dL)      | 274±210                | 213±109                                | 0.51           |
| Cholesterol (mg/dL)        | 178±35                 | 164±38                                 | 0.37           |
| HDL (mg/dL)                | 36±8                   | 38±7.7                                 | 0.39           |
| LDL (mg/dL)                | 95±33                  | 91±38.6                                | 0.70           |
| HbA1c (%)                  | 6.5±1.2                | 6.4±1.1                                | 0.87           |

BMI – Body Mass Index, AST – Aspartate Aminotransferase, ALT – Alanine Aminotransferase, T. Bili - Total Bilirubin, ALP - Alkaline Phosphatase, Cr - Creatinine, Hgb - Hemoglobin, WBC – White Blood Cell Count, INR – International Normalized Ratio, HDL – High-density lipoprotein, LDL – Low-density lipoprotein, HbA1c – Hemoglobin A1c

**Table S2.** Demographic and clinical data at pretransplant and posttransplant period.

| <b>Variables</b>                | Pretransplant | Posttransplant <sup>a</sup> | <b>P-value</b> |
|---------------------------------|---------------|-----------------------------|----------------|
|                                 | <b>N=21</b>   | <b>N=21</b>                 |                |
| <b>Age</b>                      | 59±7          | 62±7                        | 0.09           |
| <b>BMI (kg/m<sup>2</sup>)</b>   | 32.1 ±6.6     | 33±8                        | 0.79           |
| <b>AST (IU/mL)</b>              | 98.5±127.2    | 38±21                       | 0.03           |
| <b>ALT (IU/mL)</b>              | 55.5±47.0     | 51±32                       | 0.59           |
| <b>T. Bili (mg/dL)</b>          | 5.0±5.7       | 0.7±0.4                     | <0.0001        |
| <b>ALP (IU/mL)</b>              | 156.6±93.9    | 95±42                       | 0.008          |
| <b>Albumin (g/dL)</b>           | 3.0±0.6       | 4±0.4                       | <0.0001        |
| <b>Cr (mg/dL)</b>               | 1.4±0.7       | 1.2±0.4                     | 0.26           |
| <b>Hgb (g/dL)</b>               | 11.3±2.1      | 13.4±2.1                    | 0.0003         |
| <b>WBC (x10<sup>3</sup>/uL)</b> | 5.8±3.9       | 5.8±2.6                     | 0.57           |
| <b>INR</b>                      | 1.8±0.6       | 1.04±0.1                    | <0.0001        |
| <b>Triglycerides (mg/dL)</b>    | 123.8±52.7    | 213±109                     | 0.008          |
| <b>Cholesterol (mg/dL)</b>      | 149.3±42.2    | 164±38                      | 0.45           |
| <b>HDL (mg/dL)</b>              | 37.7±13.2     | 38±7.7                      | 0.91           |
| <b>LDL (mg/dL)</b>              | 90.1±35.5     | 91±38.6                     | 1              |
| <b>HbA1c (%)</b>                | 5.3±1.3       | 6.4±1.1                     | 0.02           |

<sup>a</sup>Data presented at the time of stool collection

BMI – Body Mass Index, AST – Aspartate Aminotransferase, ALT – Alanine Aminotransferase, T. Bili - Total Bilirubin, ALP - Alkaline Phosphatase, Cr - Creatinine, Hgb - Hemoglobin, WBC – White Blood Cell Count, INR – International Normalized Ratio, HDL – High-density lipoprotein, LDL – Low-density lipoprotein, HbA1c – Hemoglobin A1c
